# Supplementary material for: Functional Maps of Protein Complexes from Quantitative Genetic Interaction Data
Source: PLoS Comput Biol. 2008 Apr 18;4(4):e1000065. doi: 10.1371/journal.pcbi.1000065 (PMC2289880; doi:10.1371/journal.pcbi.1000065)
Supplement: Dataset S1 — Results tables in Excel format. (0.06 MB XLS) [file pcbi.1000065.s003.xls]

## Sheet: Complexes
Complex ID	Members	# Proteins	Most similar MIPS complex	MIPS Size	# overlap proteins with MIPS		LEGEND
3	SSD1,RRD1,PSY2,PPH3	4	550.1.169	8	2		Completely Novel Complexes (No known MIPS interaction)
5	FPR3,FPR4	2	550.2.115	31	2		Potential new subunits of known complex
14	VID30,FYV10,VID28,GID8,RMD5,YDL176W	6	550.2.427	9	5
16	SDC1,SWD3,SPP1,SHG1,SWD2,BRE2,SWD1	7	550.1.199	9	5
36	LGE1,BRE1	2	550.2.19	3	2
69	SPT23,RPN14	2	550.2.320	27	1
89	UBC13,MMS2	2	550.2.191	3	2
94	RPN2,POL4,RPN6,UBP6,GSG1,ECM29,RPN13,RPN10,HEX3,SEM1	10	550.1.110	34	5
102	UBP2,RSP5	2	550.2.327	13	1
111	RAD27,DDR48	2	550.2.268	2	1
115	GAL11,MED4,SSN2,SSN3,SIN4,SOH1,SSN8,ROX3,MED2,MED11,MED1,NUT1,PGD1,CSE2,MED8,SRB2,SRB8	17	550.1.209	43	15
135	PAT1,SNU66,LSM6,LSM7,LSM1,KEM1	6	550.1.138	36	5
149	UBC4,UBC5,UFD4	3	550.2.411	3	2
155	RGP1,RIC1	2	550.2.549	6	2
161	RAI1,RTT103	2	550.1.9	14	1
163	YCR076C,PRE9,UMP1	3	360.10.10	15	2
172	SHP1,DOA1	2	550.1.9	14	2
183	VPS75,RTT109	2			0
185	TRF5,YHP1	2			0
203	MSI1,RLF2,CAC2	3	90.1	3	3
205	PFD1,PAC10,YKE2,GIM5,GIM4,GIM3,BUD27	7	177	5	5
231	MET18,RAD3	2	550.1.231	13	2
242	AHC1,NUP84	2	550.1.124	16	1
249	MAD2,MAD1	2			0
250	SWM1,MND2,APC9	3	550.2.383	9	1
259	SIR1,DBF4	2	550.2.350	12	1
274	ELP3,ELP6,ELP4,IKI3,ELP2,IKI1	6	550.1.216	5	5
281	THP1,SAC3	2			0
283	MGM101,RIM1,RFA1,MSH2,TOP3,SGS1,MPH1,MSH6,RAD52,RFA2	10	550.1.212	35	10
290	CKS1,SIC1,CLB3,CLN2,CLN1,CLB4	6	550.1.6	10	5
298	NAP1,HTZ1	2	550.1.224	10	2
327	MUB1,RAD18,RAD6	3	550.2.285	3	2
347	POL30,HYS2,POL32	3	410.35	20	2
354	HPC2,HIR3,HIR2,HIR1,ASF1,RAD53	6	550.1.226	6	3
363	YML011C,YDR314C,RAD4,RAD23	4	550.1.202	29	3
365	VRP1,SLA1	2	140.20.20	25	2
369	HTL1,RSC58,RSC1,RSC2,RSC6,RSC8,RSC9,HTA1,RTT102	9	550.3.32	14	6
374	LHP1,BEM2	2	550.1.149	88	2
385	LRP1,RRP6	2	550.3.22	14	2
388	TFB1,SSL1	2	550.1.206	14	2
393	SKI8,SKI3,SKI2,YKL023W	4	550.2.355	4	3
399	ATP11,CDC36	2	550.1.211	26	2
401	IES3,IES5,IES4,NHP10,INO80,IES1,IES2,RVB2,RVB1,ARP8,TAF14	11	550.1.203	24	6
408	BUD13,CWC21	2	550.2.143	9	1
416	SAP190,SAP185	2	550.2.369	17	2
424	UBP3,BRE5	2			0
425	MBP1,SWI4,SWI6	3	550.1.223	2	2
428	SNF5,SNF11,SWI3	3	510.190.50	10	3
429	PPH22,RTS1,RRD2,ZDS2,ZDS1,PPH21	6	550.1.170	46	6
431	CDC10,REV3	2	550.2.244	47	1
439	MRE11,DMC1,XRS2	3	550.2.423	6	2
444	RAD10,YAL027W,RAD1	3	550.1.136	12	3
451	SAS5,SAS4,SAS2	3	400	10	1
456	RPB4,RPB3,TFG2,TFG1,DST1,IWR1,RPO21,SPT4	8	550.1.210	19	7
457	IOC2,IOC4	2			0
461	DPB4,DPB3	2	550.1.190	4	2
472	RFC5,RFC4,RFC1,RFC3,CTF18,ELG1	6	550.1.205	14	6
486	MNN11,MNN10	2	550.1.72	7	1
498	CTF8,DCC1	2	550.1.205	14	1
511	TOF1,CSM3	2			0
514	MEI5,SOY1	2			0
517	VPS64,HCS1	2	550.2.449	7	1
519	HRB1,RLR1,GBP2,TEX1,MFT1,THP2	6	550.2.106	9	5
539	RTG3,RTG1	2	510.190.130	2	2
543	RAD7,ELC1	2	550.2.286	3	2
554	MEC3,RAD17	2	550.2.177	2	2
565	CAF130,CAF40	2	550.1.211	26	2
567	SWC7,SWC5,SWC3,YAF9,ARP6,VPS71,SWR1,VPS72	8	550.3.14	15	1
581	IOC3,NHP6B,ISW2,ITC1	4	550.1.200	28	4
606	PMS1,MLH2,MLH1	3	550.1.212	35	2
608	MCK1,LTE1	2	550.1.170	46	1
611	SNT1,HST1,HOS4,HOS2,SET3,SIF2,CPR1	7	550.1.101	10	6
621	VID22,TBF1,YGR071C	3	550.1.214	50	1
623	RTT101,MMS1	2	550.2.134	33	2
634	PAC2,CIN1	2	550.1.170	46	1
641	TAF7,TAF6,TAF5,TAF4,TAF1,SPT8,UBP8,HFI1,SGF29,SGF73,TAF13,TAF12,TAF9,NGG1,SPT3,SGF11,GCN5	17	550.1.207	28	13
646	HAT1,HHT2,HAT2	3	550.1.204	50	2
668	PHO23,SAP30,RCO1,CTI6,UME1,UME6,RXT2,RXT3,SIN3,EAF3,DEP1,RPD3,SDS3	13	550.1.208	31	13
673	CHD1,CKA1,CKA2,CDC73,PAF1,LEO1,CTR9,RTF1,CKB1,CKB2,POB3	11	550.1.201	13	10
677	BUB1,BUB3	2	550.2.537	3	1
690	ARO1,ILV1,GCN1,GCN20,SAM1,TUB3	6	550.1.41	34	4
692	MUS81,MMS4	2	550.2.200	26	2
697	VID21,CIN8,YNG2,EAF5,EAF6,EAF7	6	550.1.191	12	2
700	PTI1,PTA1,SSU72	3	550.1.148	36	3
703	RPC40,RPC34,RPA14,RET1,RPA34,RPA43,RPC11,RPC25,RPC31,RPA190,RPA49,RPO26	12	550.1.213	29	10
705	TEL1,ECM5,DYN1,MAC1	4	550.1.204	50	4
711	NTO1,YLR455W,SAS3	3			0
719	RNH201,RNH202	2	550.2.23	29	1
724	SNF4,SNF1,RAD30,GAL83	4	550.1.166	10	3
728	TAH1,PIH1	2			0
739	CTF3,MCM16,MCM21,CHL4,MCM22,CTF19,IML3	7	550.1.221	8	6

## Sheet: Between Complexes
COMPLEX 1	COMPLEX 2	# Between Genetic interactions	Mean between S-score	P-value
135	347	16	1.2679	8e-06
347	511	6	-6.7365	0
283	347	24	-2.3272	3e-05
347	567	23	-2.9687	0
347	472	10	-5.0987	0
341	668	13	-6.106	0
595	668	12	-4.2306	0
425	595	2	-10.236	0.000148
160	719	2	-8.1492	0.000992
354	718	5	-5.1531	0.000244
611	715	7	2.1538	4.4e-05
135	715	6	3.5671	0
115	715	17	-2.1905	0.000576
425	715	2	3.3879	0.00054
205	711	19	0.9526	0.000186
298	456	14	-3.084	3.4e-05
205	298	14	-4.141	0
298	668	25	-2.5583	6e-06
298	425	6	-4.2018	0.00056
205	294	7	2.2956	2.2e-05
294	567	7	-6.0372	0
591	668	12	1.0849	0.000818
199	668	13	1.4912	1e-05
274	641	74	-1.1942	5.2e-05
274	435	5	-4.6854	0.000632
274	337	6	-7.4122	0
274	627	6	3.0226	0
183	274	11	2.2306	0
274	653	6	-5.8993	8e-06
205	274	36	-2.0019	4e-06
274	71	6	2.8081	1e-05
274	668	70	-1.8226	0
274	544	6	2.5418	3e-05
274	365	8	-5.2499	4e-06
216	274	6	-9.053	0
274	539	12	1.3113	0.000102
115	274	82	-1.5447	0
274	425	10	-3.9695	2.2e-05
274	424	12	1.2267	0.000222
274	48	6	1.6357	0.000758
205	278	5	-4.9796	0.000338
521	673	9	-4.1892	2.6e-05
205	449	6	-7.2521	0
205	39	6	-6.132	6e-06
205	31	5	-7.1442	4e-06
337	36	2	-12.987	8e-06
155	36	4	-8.4457	6e-06
36	456	16	-2.3132	0.000456
36	653	2	-12.206	2e-05
16	36	14	1.7956	0
205	36	14	1.9492	0
36	77	2	-9.5707	0.000268
36	668	25	-4.4206	0
36	544	2	-8.5	0.000714
36	736	2	-11.093	5.4e-05
216	36	2	-9.3672	0.000324
36	673	21	1.2673	0
115	36	32	-1.6587	0.000272
36	425	4	-7.9686	8e-06
36	424	4	-6.1456	0.000184
36	567	16	-9.7589	0
205	35	7	-8.0894	0
34	668	12	-4.27	0
498	641	32	-1.8982	5.4e-05
172	641	34	-2.0555	1.4e-05
205	641	106	0.71018	0
641	668	184	-0.83542	2e-05
641	699	16	1.1161	8.6e-05
633	641	5	1.8119	0.000826
281	641	26	-1.7781	0.000428
531	641	16	-2.2144	0.000728
115	641	159	-0.90717	1e-05
428	641	35	-1.769	6.2e-05
424	641	34	-1.7065	0.00013
567	641	116	-2.6258	0
644	668	12	2.5359	0
354	644	4	2.2275	0.000388
644	673	8	1.4438	0.000498
115	644	10	1.8094	1.2e-05
135	646	18	-2.174	0.000442
205	435	7	1.9114	7.4e-05
205	335	6	-4.6125	0.000208
115	335	17	-3.8933	0
335	567	8	-5.4527	0
334	567	7	-3.958	0.000388
16	337	6	-7.5117	0
337	668	13	-5.2084	0
115	337	13	-4.4134	0
337	567	8	-6.6559	0
135	336	4	-6.6902	7.8e-05
336	456	6	-4.1867	0.00057
115	336	16	-3.7458	0
205	333	6	1.7181	0.000492
94	98	9	-3.4017	0.000348
135	98	6	1.7589	0.00038
205	91	7	-6.3557	0
668	91	12	-2.7691	0.000422
611	94	58	0.49129	0.00016
512	94	9	-3.798	0.000102
627	94	10	-4.4111	8e-06
16	94	57	-1.3356	7.8e-05
205	94	60	1.4872	0
668	94	116	-1.2966	0
649	94	6	-4.3231	0.000432
354	94	53	-1.2092	0.000488
281	94	15	1.2553	1.4e-05
425	94	21	-2.4679	5.4e-05
472	94	41	-1.6146	6.2e-05
205	97	4	-10.472	0
567	740	8	-7.87	0
14	559	6	-6.971	0
511	554	4	-9.3272	0
401	550	11	1.4199	7.4e-05
205	550	7	1.8419	0.000104
550	668	12	1.1631	0.000416
552	668	12	-4.4045	0
552	673	11	-3.5494	4.6e-05
236	673	11	-2.8671	0.000566
205	231	11	1.7299	8e-06
115	231	24	-2.4863	1.2e-05
231	567	14	-5.0172	0
155	296	2	-10.702	8.8e-05
155	645	2	-10.817	7.4e-05
155	337	2	-11.163	4.8e-05
155	91	2	3.5691	0.000336
155	552	2	-12.578	1.4e-05
155	611	13	-4.2775	0
135	155	8	2.7536	0
155	702	2	3.5081	0.000384
155	653	2	-8.9233	0.000482
155	184	2	-9.6551	0.00026
155	205	13	1.6397	2e-06
155	668	20	1.6215	0
155	415	2	-10.263	0.000146
155	413	2	3.6581	0.000262
155	365	2	3.414	0.000506
155	736	2	-9.1304	0.000396
155	163	3	2.7579	0.000276
155	354	10	-4.0996	1.6e-05
155	216	2	-12.421	1.4e-05
155	673	16	-3.3492	6e-06
155	424	4	-9.5004	0
155	567	14	-8.045	0
155	724	7	-5.3558	4e-06
155	608	2	-9.3924	0.000308
155	474	2	-13.737	0
205	619	7	-6.0554	0
143	354	5	-11.478	0
143	673	10	-2.9548	0.0007
205	610	6	2.1774	6.6e-05
610	668	13	1.3727	3.2e-05
611	653	6	-5.8219	1.2e-05
205	611	47	-2.0181	0
611	668	88	-2.6421	0
544	611	6	-5.0728	7.6e-05
115	611	106	0.32699	0.000146
567	611	55	-3.8497	0
159	611	7	3.0567	0
482	611	7	-4.148	0.000256
135	616	5	2.6729	4.4e-05
205	616	5	2.0936	0.000198
205	617	6	2.0241	0.000118
149	456	21	0.84277	0.000398
149	424	6	2.2266	5.6e-05
205	683	7	1.7231	0.00019
622	668	12	-2.9964	0.000186
567	622	7	1.7406	0.000172
133	205	7	1.6168	0.000368
133	668	13	1.0232	0.000912
133	739	6	-4.3983	0.000362
133	354	4	-7.0043	3.6e-05
249	498	4	-7.7579	1.2e-05
498	511	4	-10.952	0
498	623	4	2.1358	0.00059
498	627	2	-10.844	7.4e-05
205	498	12	-5.2522	0
418	498	2	-8.9723	0.000454
360	498	2	-8.844	0.00052
164	498	2	-8.4422	0.000738
135	393	20	-3.4861	0
135	519	34	-1.5949	0.000292
135	517	9	1.3176	0.000582
135	203	18	0.98046	0.000192
135	205	38	0.69915	5.2e-05
135	77	6	2.7112	1e-05
135	668	76	-1.1103	0.000136
135	418	6	-6.8359	0
135	319	5	2.5396	5.8e-05
135	360	5	-8.6134	0
135	385	12	2.2729	0
135	65	4	2.6106	9.2e-05
135	163	16	1.081	0.000138
135	649	3	-6.2531	0.000992
135	354	32	-4.9099	0
135	281	9	-4.7158	8e-06
115	135	83	-2.9286	0
135	424	12	-2.9856	0.000188
135	567	46	-4.8215	0
135	47	4	2.1252	0.00061
135	486	8	-3.5619	0.000456
3	493	2	-8.197	0.00092
115	493	10	1.4889	8.4e-05
115	25	14	1.4295	0
25	567	8	1.4038	0.000612
115	27	16	-2.3405	0.000396
22	567	7	1.9517	7e-05
29	567	8	-3.8686	0.000216
407	567	7	2.2601	3e-05
205	404	6	-4.7257	0.000158
391	401	3	-6.6567	0.000596
401	581	31	-2.4103	4e-06
401	518	8	1.6052	0.000184
401	621	28	1.0132	0
172	401	22	-1.8844	0.000588
401	668	126	-1.3138	0
401	577	6	-4.2118	0.000554
354	401	59	-1.79	0
115	401	129	-1.3994	0
401	428	25	0.78417	0.000296
401	567	80	-1.0005	0.00043
159	401	6	-6.6512	0
408	567	13	-2.6041	0.000494
205	703	69	0.52766	8e-06
699	703	12	1.088	0.000798
205	393	24	1.2164	0
393	668	47	0.48593	0.000792
369	393	22	0.83378	0.000324
159	393	3	2.5687	0.00056
391	567	6	-4.1921	0.000568
205	586	5	2.45	6.6e-05
567	586	7	1.6533	0.000286
369	581	25	1.0409	2e-06
159	581	3	2.8434	0.0002
244	739	6	-4.8472	0.00012
244	472	6	-7.8592	0
240	668	11	1.4794	5.2e-05
16	242	10	-3.8708	3.4e-05
242	668	20	-2.9	6e-06
242	354	10	-3.1445	0.000402
242	283	9	-3.9571	5.4e-05
242	673	14	-2.8436	0.000112
242	424	4	-6.1746	0.000174
242	567	12	-6.2379	0
249	740	2	-13.286	0
244	249	2	-10.01	0.000178
249	627	2	-12.918	8e-06
205	249	14	-8.0322	0
249	74	2	-13.33	0
249	697	12	-2.625	0.000754
249	418	2	-15.88	0
249	739	13	-9.5939	0
249	634	4	-7.3621	2e-05
249	649	2	-12.335	1.6e-05
249	567	16	-3.4042	4e-06
512	519	6	-4.0881	0.000728
385	519	12	-3.5429	2.2e-05
424	519	12	-3.4137	3.6e-05
518	668	13	2.452	0
511	599	2	-11.063	6e-05
458	511	2	-8.4575	0.000732
511	627	2	-11.803	2.6e-05
207	511	2	-10.523	0.000114
418	511	2	-10.959	6.6e-05
383	511	2	-11.205	4.6e-05
511	649	2	-12.462	1.4e-05
283	511	18	-2.8159	4e-05
511	677	4	-7.3778	2e-05
48	511	2	-11.132	4.8e-05
472	511	11	-4.6333	0
512	567	7	-9.2399	0
517	668	23	1.5547	0
337	623	2	-9.8724	0.000196
493	623	2	-11.074	5.8e-05
121	623	2	-10.192	0.000152
205	621	19	0.98784	0.000118
621	668	35	1.2406	0
115	621	36	0.6577	0.000186
456	627	8	2.2301	1.4e-05
627	668	13	-5.1763	0
627	697	5	-4.4484	0.00098
627	739	7	-11.629	0
567	627	8	2.6291	0
354	624	6	-7.9087	0
624	673	11	-3.1541	0.000198
451	668	38	-2.398	0
16	456	45	-1.3886	0.00025
354	456	41	-1.3984	0.000432
281	456	14	-3.3656	1.2e-05
424	456	16	-3.3322	6e-06
456	567	57	-3.0363	0
172	668	25	-2.3488	1.8e-05
172	439	5	-4.5862	0.000786
172	354	10	-3.6918	7.2e-05
172	216	1	5.1987	0.000886
115	172	32	-1.6584	0.000272
172	425	5	-4.9172	0.000398
172	567	15	-3.7632	0
183	424	4	2.079	0.000778
655	739	7	-10.668	0
653	668	12	-8.2955	0
653	673	9	-4.9415	8e-06
567	653	7	-10.872	0
14	471	6	-5.3497	4.2e-05
16	325	6	-3.9961	0.000896
16	205	45	1.071	0
16	668	81	-0.96801	0.000656
16	736	5	-9.3349	0
16	633	5	2.2279	0.00012
115	16	100	-1.2425	4e-06
16	425	17	-2.5121	0.000112
16	424	13	-2.491	0.000794
16	567	49	-3.0484	0
16	738	5	-6.0725	3.8e-05
205	327	18	1.6754	0
327	71	3	2.5063	0.000716
327	668	36	0.68294	0.000116
205	325	5	2.6273	5e-05
325	668	10	-4.0999	1.6e-05
325	567	6	2.2867	5.2e-05
203	205	19	0.85683	0.000648
203	668	38	0.67095	9.6e-05
203	418	3	2.4684	0.00082
203	354	17	-4.5825	0
205	77	7	2.0442	5.2e-05
205	74	7	-10.823	0
205	71	5	4.2505	0
205	660	5	-5.2382	0.000202
205	697	37	-2.4023	0
205	544	5	3.6612	0
205	545	6	1.6964	0.000554
205	418	5	-9.7828	0
205	365	11	-4.7073	0
205	382	5	2.5614	5.4e-05
205	385	13	3.2293	0
205	65	5	2.8047	3.2e-05
205	734	5	1.8006	0.00088
205	736	7	-3.9015	0.00045
205	739	42	-3.962	0
205	634	11	-10.281	0
165	205	7	-3.5807	0.00096
163	205	18	1.5099	0
205	649	5	-9.7599	0
205	355	7	-4.421	0.00012
205	217	7	2.1355	4.6e-05
205	283	58	0.58542	2e-06
205	677	10	-6.0302	0
205	673	68	1.1937	0
205	530	7	-6.8024	0
205	424	14	2.7654	0
205	567	54	-6.97	0
205	229	7	-5.5839	0
205	223	7	1.5678	0.000494
205	726	5	-5.1118	0.000274
205	722	7	2.288	2.2e-05
205	601	6	-4.2693	0.00049
205	609	5	2.3282	8.8e-05
205	486	7	-5.6876	0
206	668	13	1.0147	0.000994
668	77	13	1.7783	0
163	77	2	3.6061	0.000308
673	77	11	-4.2514	4e-06
567	77	8	-6.3335	0
567	74	8	-4.9123	6e-06
668	693	12	-2.5996	0.000826
418	668	13	-3.3223	2.2e-05
369	668	97	-1.0386	6e-05
385	668	25	0.94014	2e-05
62	668	12	1.7768	0
668	736	13	-5.0735	0
216	668	12	-3.2179	8e-05
281	668	26	-4.172	0
282	668	12	-3.6464	1.4e-05
668	672	10	-4.192	1.2e-05
668	673	131	-0.93817	3.4e-05
268	668	11	1.3713	0.000118
53	668	12	-3.1785	8.8e-05
531	668	12	-4.1369	0
115	668	189	-1.0101	0
428	668	36	-1.4519	0.000586
425	668	33	-2.2346	6e-06
309	668	13	1.2761	7.2e-05
567	668	99	-6.4007	0
668	738	12	-3.321	5e-05
668	722	11	1.6821	1.4e-05
486	668	24	-1.9716	0.000226
482	668	13	-4.6397	0
471	668	12	1.1972	0.000292
121	692	2	-9.3992	0.000306
160	692	2	-12.631	1.2e-05
283	692	20	-2.6787	3e-05
472	692	11	-2.9477	0.000418
567	690	40	-2.5274	0
697	736	4	-5.8941	0.000296
115	697	70	-1.0835	0.000362
567	697	43	-4.249	0
544	567	7	-6.9051	0
283	545	9	-3.0888	0.000846
121	283	9	-3.6616	0.000158
283	413	10	-3.8178	4.2e-05
413	567	8	-3.8002	0.000256
413	472	6	-4.393	0.000366
418	739	7	-12.65	0
418	567	8	-4.7057	1e-05
319	567	7	2.5906	1e-05
3	369	20	0.84155	0.000576
3	425	9	-4.5879	1e-05
369	428	15	1.6494	0
369	425	14	1.0499	0.000424
369	567	60	-2.5537	0
365	77	2	3.2666	0.000752
365	736	2	-9.7153	0.000244
169	365	2	-11.438	3.6e-05
365	567	12	1.2962	0.000116
281	385	4	-5.4234	0.000636
385	567	16	-2.582	0.000124
115	386	17	0.93404	0.000432
115	572	12	1.7049	0
354	577	5	-13.036	0
567	577	7	-5.3047	6e-06
250	531	2	-8.2883	0.000834
567	736	7	-3.5904	0.000942
649	739	6	-7.7807	0
677	739	14	-7.6437	0
115	739	81	0.48305	1e-05
567	739	50	-1.5391	2.2e-05
567	633	7	-3.6813	0.000766
634	677	4	-6.6412	8.2e-05
567	634	13	-5.366	0
169	673	11	-2.7771	0.000762
169	567	8	2.2994	1e-05
161	677	2	3.3776	0.000562
161	567	11	-4.2783	4e-06
163	281	6	1.6015	0.000902
163	567	21	0.82413	0.000512
439	472	18	-2.6871	5.6e-05
354	673	59	-2.4031	0
115	354	81	-2.3446	0
216	673	9	-4.7508	8e-06
115	216	15	-3.0024	3.2e-05
216	567	7	-6.4729	0
281	620	2	3.3861	0.000552
121	281	2	3.1729	0.00095
281	677	4	-6.219	0.000158
281	673	21	-1.916	0.000652
281	531	2	-8.8072	0.000538
115	281	25	-3.2797	0
281	567	15	-5.3303	0
159	283	6	-5.2409	5e-05
567	674	7	-9.2975	0
527	677	2	3.2431	0.000804
617	677	1	5.5749	0.000494
493	677	2	3.2656	0.000754
244	677	2	-11.453	3.6e-05
627	677	2	-8.3231	0.00081
418	677	2	-9.6057	0.000266
165	677	2	-10.517	0.000114
530	677	2	-8.608	0.00066
567	677	16	-5.8461	0
472	677	12	-3.9215	4e-06
424	673	21	-2.8108	1e-05
567	673	80	-2.2855	0
268	567	7	1.8324	0.000112
425	531	2	-9.8327	0.000208
115	425	30	-1.6186	0.00053
115	424	34	-2.641	0
115	426	10	1.5492	7e-05
115	567	117	-3.2091	0
425	428	5	-4.8307	0.00048
425	486	4	-7.2358	2.6e-05
296	424	2	-10.186	0.000152
355	424	2	4.0862	8.2e-05
216	424	2	-8.9184	0.000484
424	567	16	-2.9081	2.6e-05
567	738	7	-3.8146	0.000566
159	567	7	-7.8583	0
486	567	13	1.3323	4.8e-05
483	567	8	2.0582	2.8e-05
481	567	8	-5.81	0
472	567	44	-1.34	0.000476
471	567	7	1.8463	0.000102
472	48	6	-5.2969	4.4e-05
486	715	2	4.1625	7.4e-05
486	552	2	-9.5084	0.00029
169	486	2	-9.0367	0.000432
